# Supplementary material for: Genome-wide association study identifies susceptibility loci for B-cell childhood acute lymphoblastic leukemia
Source: PubMed Central journal article supplement (PMC5890276; doi:10.1038/s41467-018-03178-z), 2018-04-09
Supplement: 41467_2018_3178_MOESM3_ESM.pdf [file 41467_2018_3178_MOESM3_ESM.pdf]

## **Description of Supplementary Files**

File Name: Supplementary Data 1

Description: Functional annotations of BCP-ALL risk loci from the ENCODE HaploReg resource and eQTL data for risk loci from the Muthur eQTL datasets.
